# Supplementary material for: Variant of SNP rs1317082 at CCSlnc362 (RP11-362K14.5) creates a binding site for miR-4658 and diminishes the susceptibility to CRC
Source: PubMed Central journal article supplement (PMC6281592; doi:10.1038/s41419-018-1222-5), 2018-12-05

Supplementary Figure 1

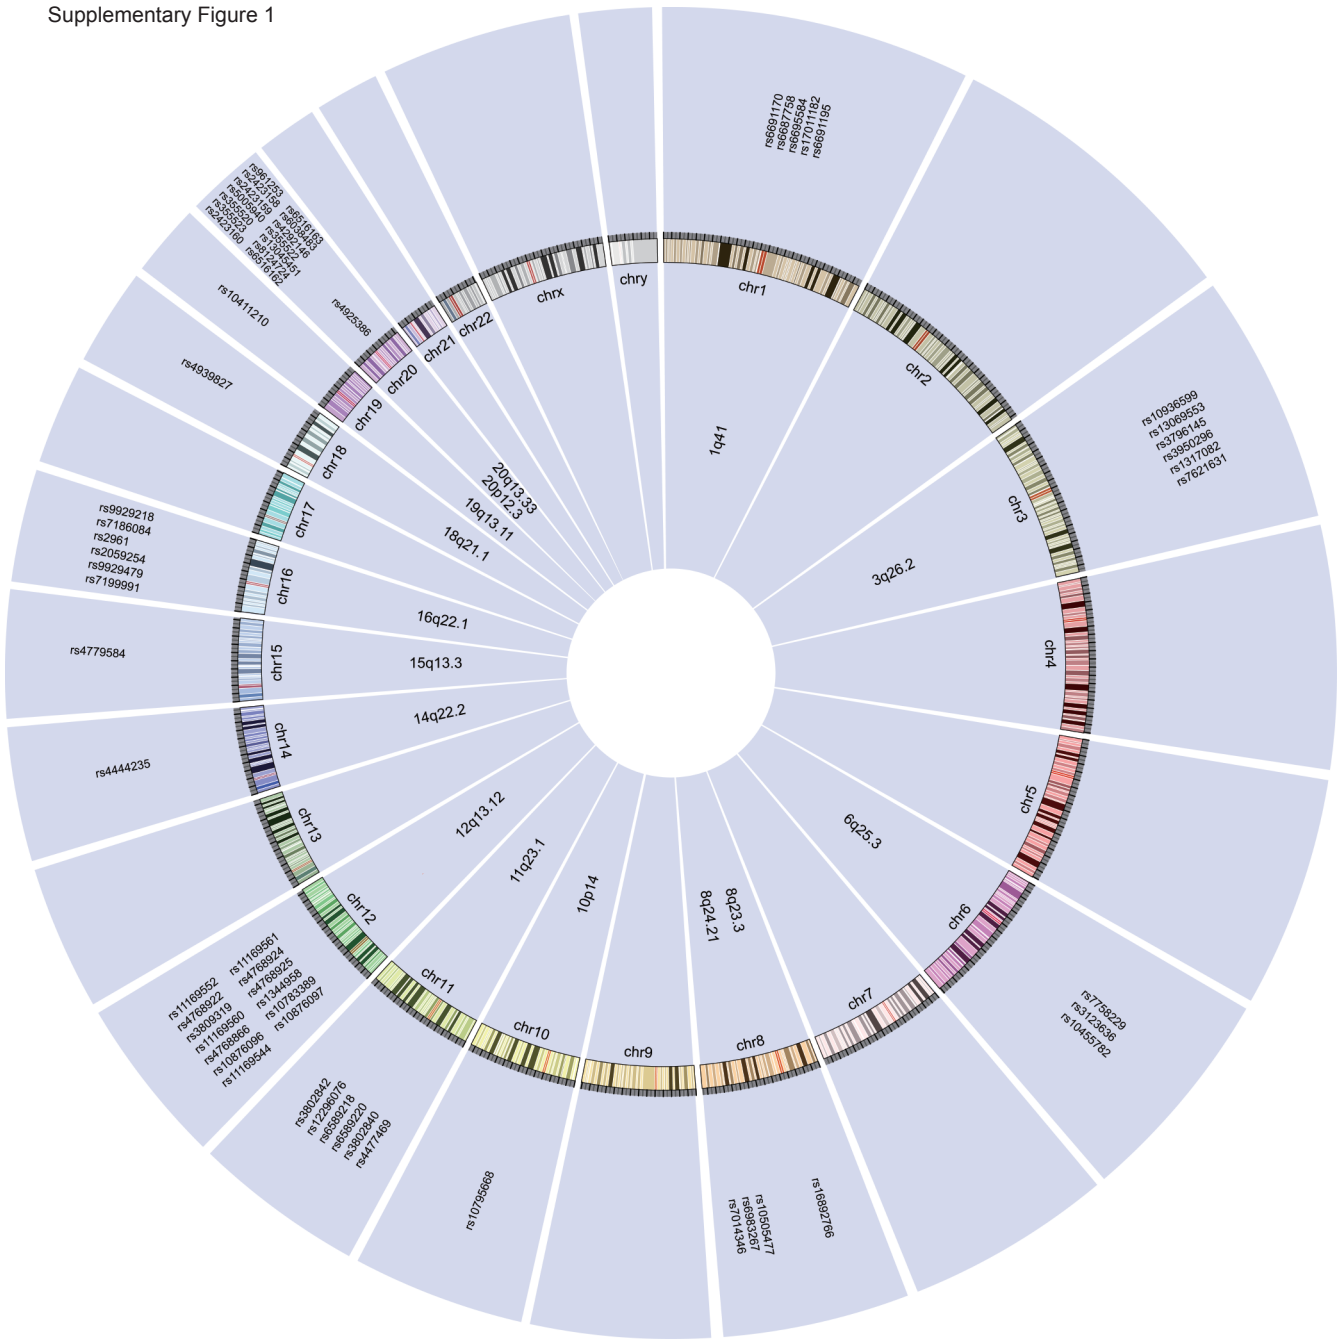

Supplement: 41419_2018_1222_MOESM1_ESM.pdf [file 41419_2018_1222_MOESM1_ESM.pdf]
